# Supplementary material for: Tumor-targeted silencing of the peptide transporter TAP induces potent antitumor immunity
Source: PubMed Central journal article supplement (PMC6704146; doi:10.1038/s41467-019-11728-2), 2019-08-21
Supplement: 41467_2019_11728_MOESM1_ESM.pdf [file 41467_2019_11728_MOESM1_ESM.pdf]

## SUPPLEMENTARY FIGURES & TABLES

### **Tumor-targeted silencing of the peptide transporter TAP induces potent antitumor immunity**

Greta Garrido<sup>1</sup>, Brett Schrand<sup>1</sup>, Ailem Rabasa<sup>1</sup>, Agata Levay<sup>1</sup>, Francesca D'Eramo<sup>1</sup>, Alexey Berezhnoy<sup>1</sup>, Shrey Modi<sup>2</sup>, Tal Gefen<sup>1</sup>, Koen Marijt<sup>3</sup>, Elien Doorduijn<sup>3</sup>, Vikas Dudeja<sup>2</sup>, Thorbald van Hall<sup>3</sup>, Eli Gilboa<sup>1\*</sup>

Department of Microbiology and Immunology<sup>1</sup>, Department of Surgery<sup>2</sup>, University of Miami, Miller School of Medicine, Miami, FL, Department of Medical Oncology<sup>3</sup>, Leiden University Medical Center, Leiden, Netherlands.

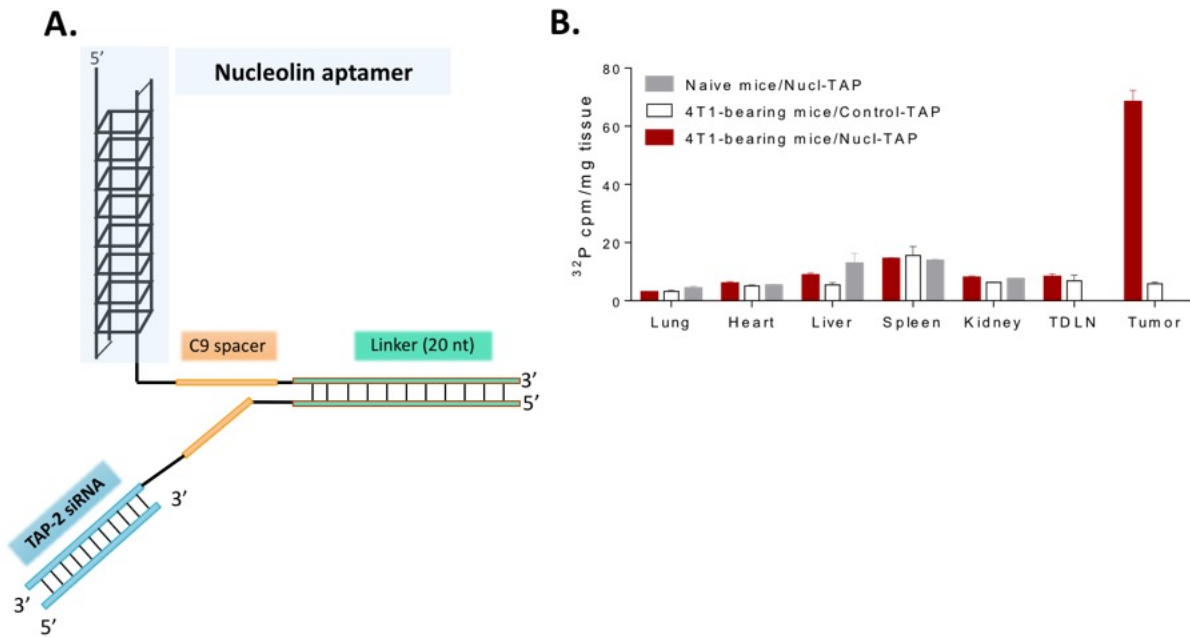

**Supplementary Fig. 1.** Accumulation of systemically administered nucleolin aptamer-shRNA conjugates in tumors. **A.** Structure of a 26 nt G-rich G-quartet forming nucleolin aptamer<sup>17</sup> conjugated to a TAP siRNA. **B.** <sup>32</sup>P-labeled nucleolin or a non-binding aptamer conjugated to TAP-shRNA were administered via intraperitoneal to subcutaneously implanted 4T1 tumor bearing mice or the nucleolin aptamer was administered to tumor-free mice, and 24 h later tumor and indicated organs were excised and radioactivity was measured using a scintillation counter. Data represent means ± SEM (4 mice/group).

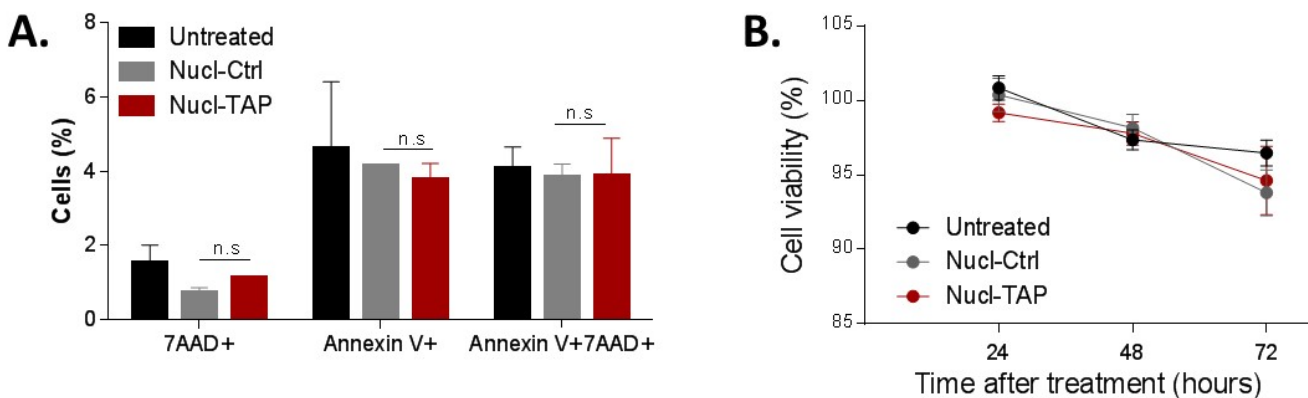

**Supplementary Fig. 2.** Toxicity of Nucl-TAP or Nucl-Ctrl siRNAs in cultured tumor cells. 4T1 tumor cells were cultured in the presence of 0.5 μM aptamer conjugates (n=2). **A.** Apoptosis. After 24 h was determined by staining with 7AAD and Annexin-V, and analyzed by flow cytometry. **B.** Cell viability was determined by MTT assay 1, 2 and 3 days after aptamer-siRNA conjugate treatment. Data represent means ± SEM of triplicate wells.

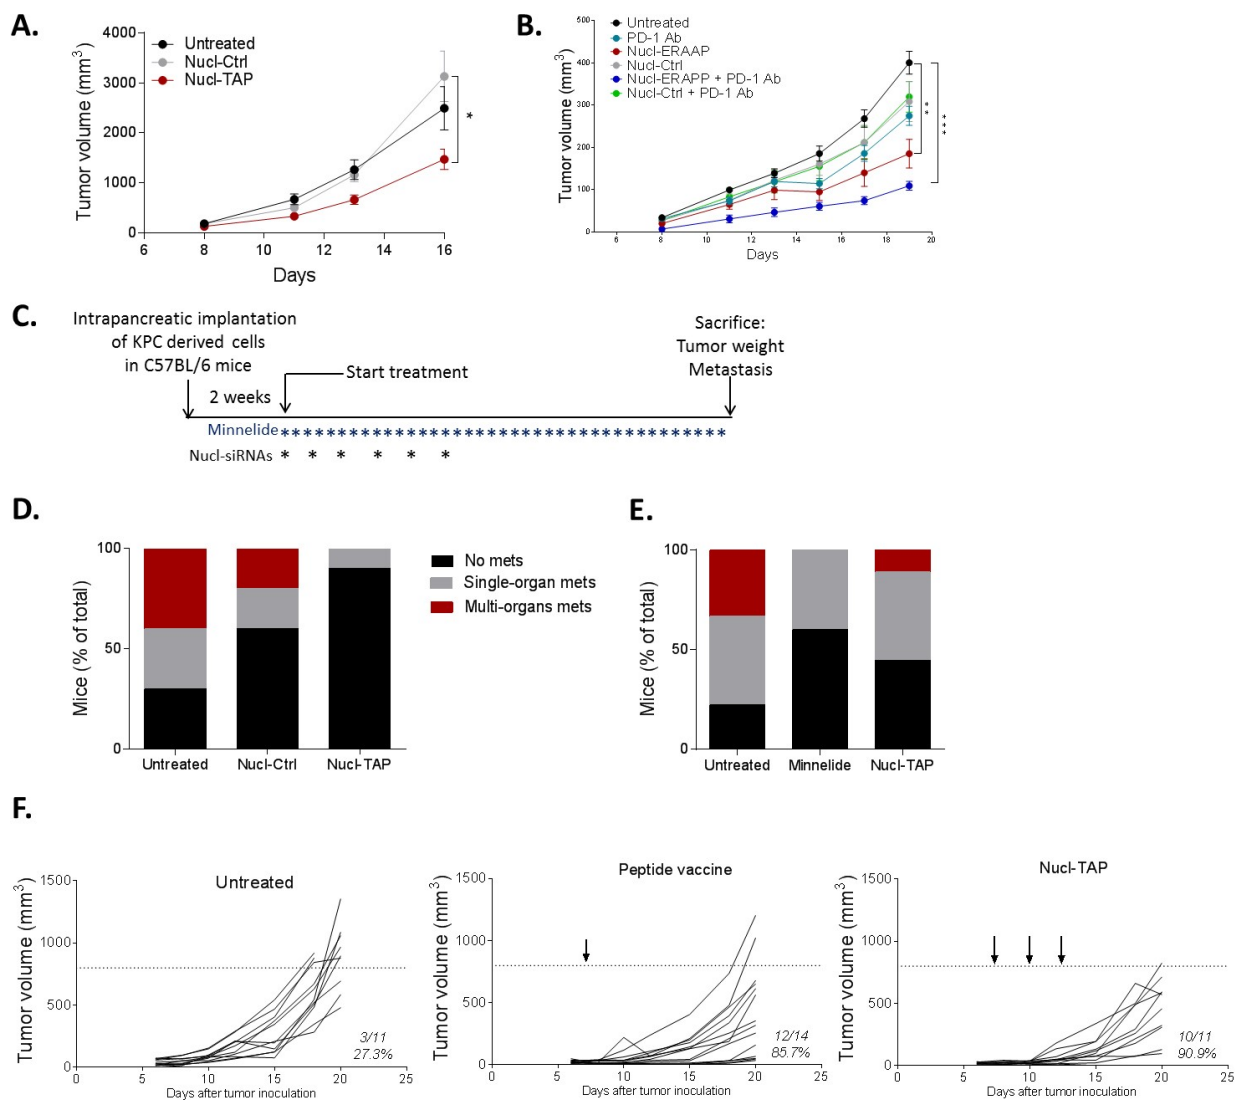

**Supplementary Fig. 3. Nucleolin aptamer-targeted TAP siRNA mediated inhibition of tumor growth in mice.**

**A.** RMA T lymphoma model. Subcutaneously implanted palpable day 7 RMA tumor bearing C57BL/6 mice were administered i.p. with Nucl-TAP or Nucl-Ctrl, repeated two additional times 3 days apart, and tumor growth was monitored. (8-9 mice/group) (n=4). **B.** Nucleolin aptamer-targeted ERAAP siRNA mediated inhibition of tumor growth in mice – synergy with anti-PD-1 antibody treatment. Subcutaneously implanted palpable day 8 4T1 tumor bearing Balb/c mice were administered intraperitoneally with Nucl-ERAAP or Nucl-Ctrl followed by PD-1 antibody a day later, repeated two additional times 3 days apart, and tumor growth was monitored. (7-13 mice/group) (n=2). Data are represented as mean  $\pm$  SEM. **C-E.** Nucl-TAP mediated inhibition of metastasis in the KPC-derived pancreatic cancer model. Each column represents the metastatic burden per group. **C.** Experimental protocol. See Methods & details in Fig. 3D & E. **F.** Nucl-TAP mediated inhibition of tumor growth in the MC38 tumor model. Experiments as shown in Fig. 3G, except that data are presented for individual mice as shown in reference<sup>21</sup>. Arrows indicate treatment frequency for each group.

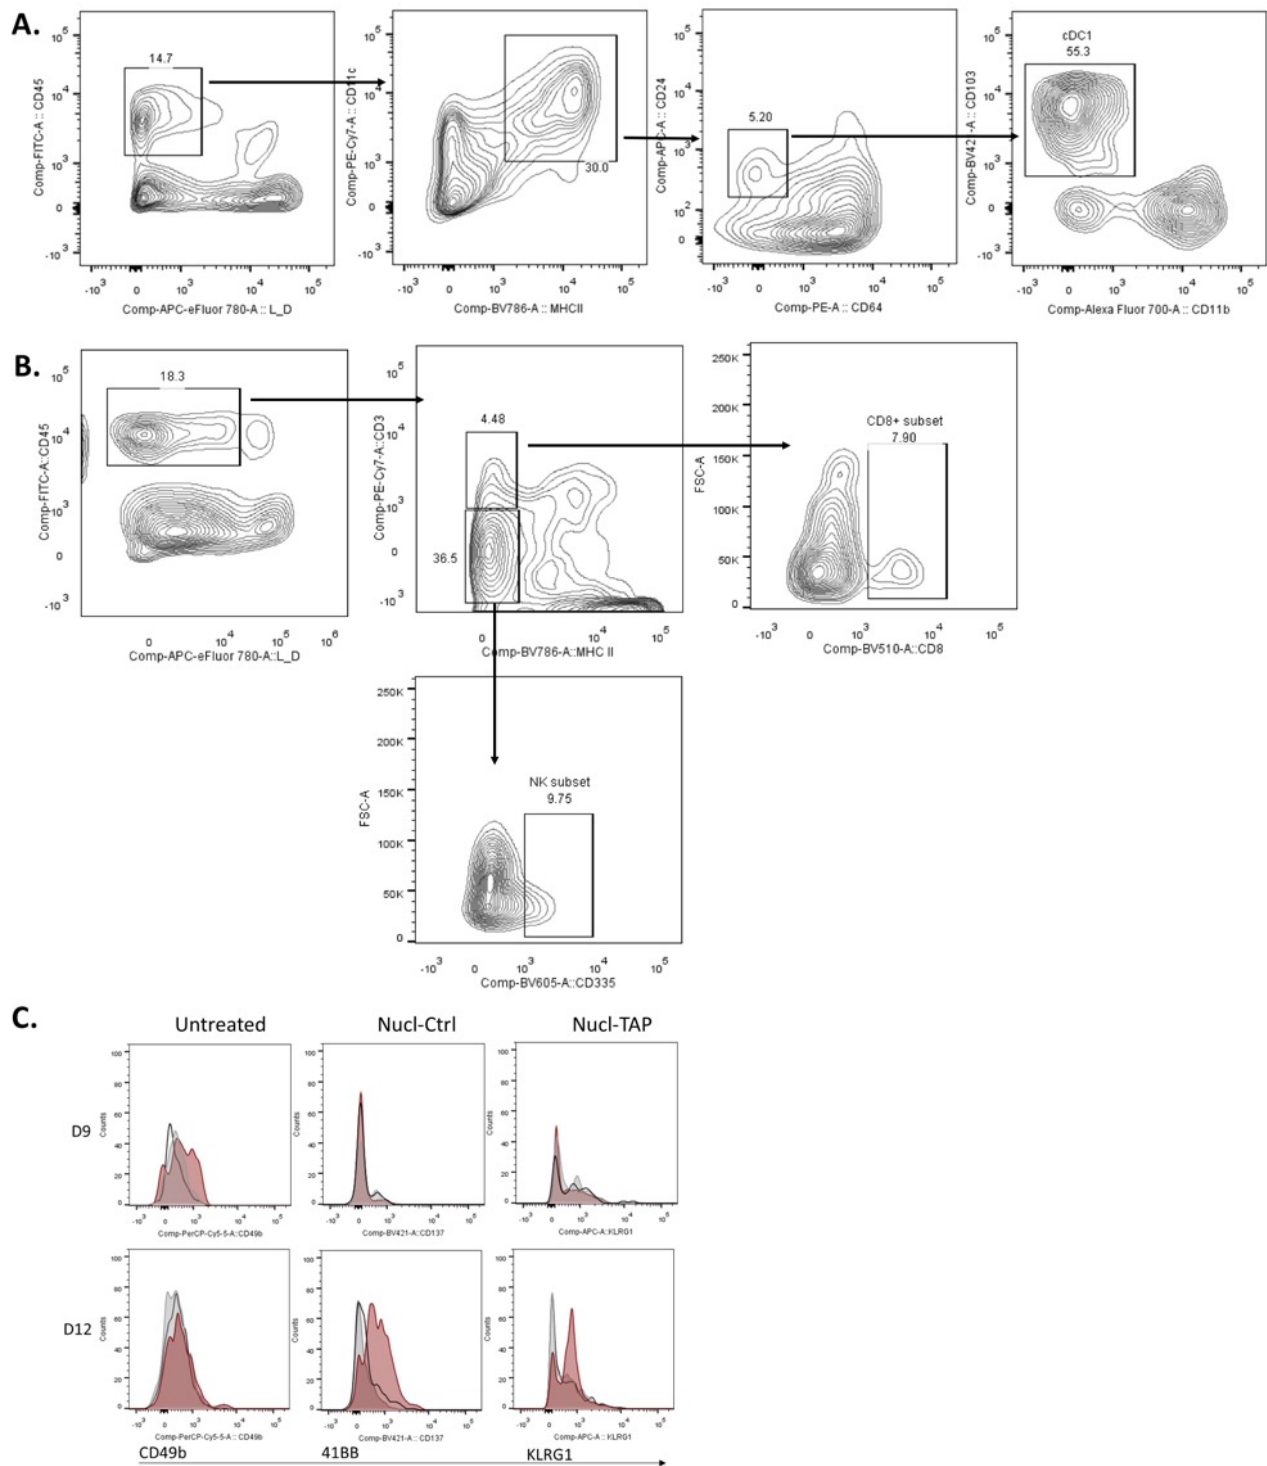

**Supplementary Fig. 4.** NK, CD8+ T cells and cDC1 accumulate in the TME of Nucl-TAP treated tumor bearing mice. 4T1-bearing mice were injected i.p. with Nucl-siRNA conjugates as described in Fig.3A and infiltrating immune cells were analyzed 2 days after the first and second dose by flow cytometry. Gating strategy to identify intratumoral NK and CD8+T cells (**A**) or cDC1 (**B**). Numbers represent % cells within depicted gate. **C.** Analysis of intratumoral NK cells for maturation and activation markers, representative tumor.

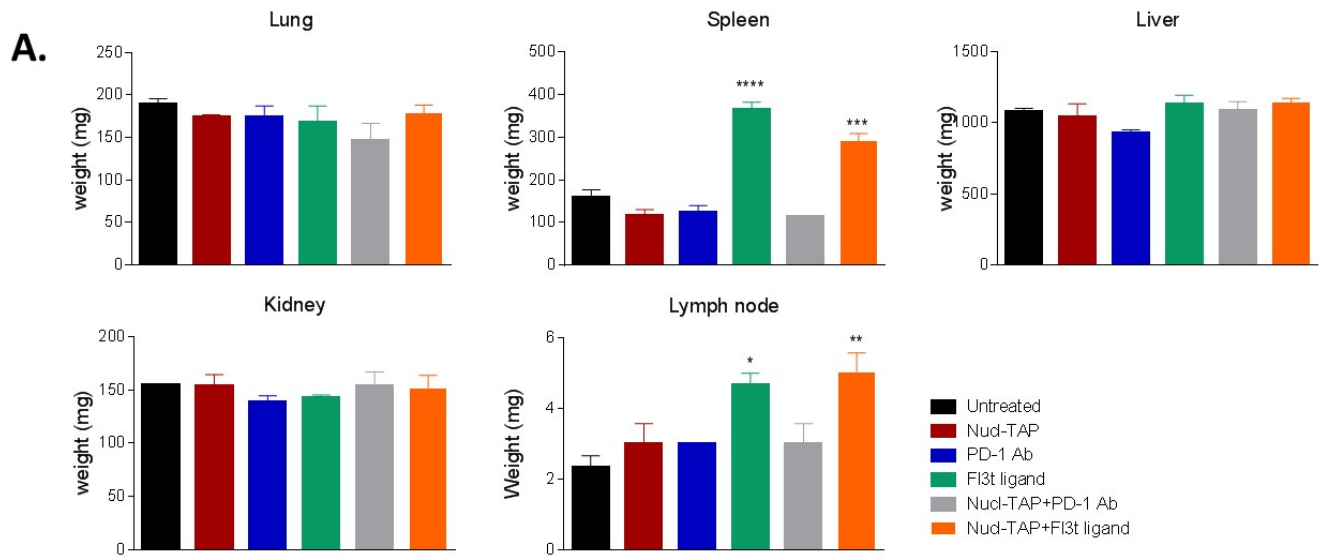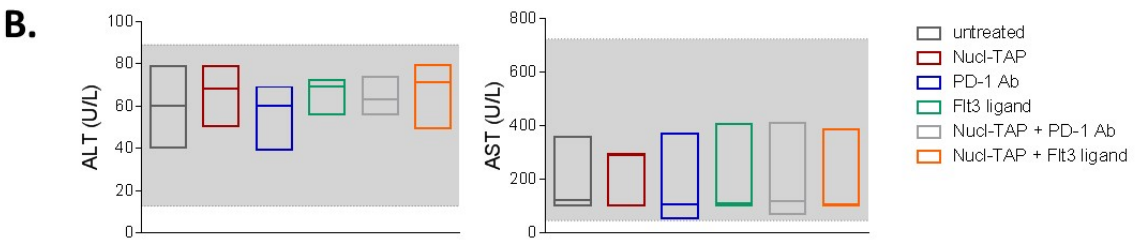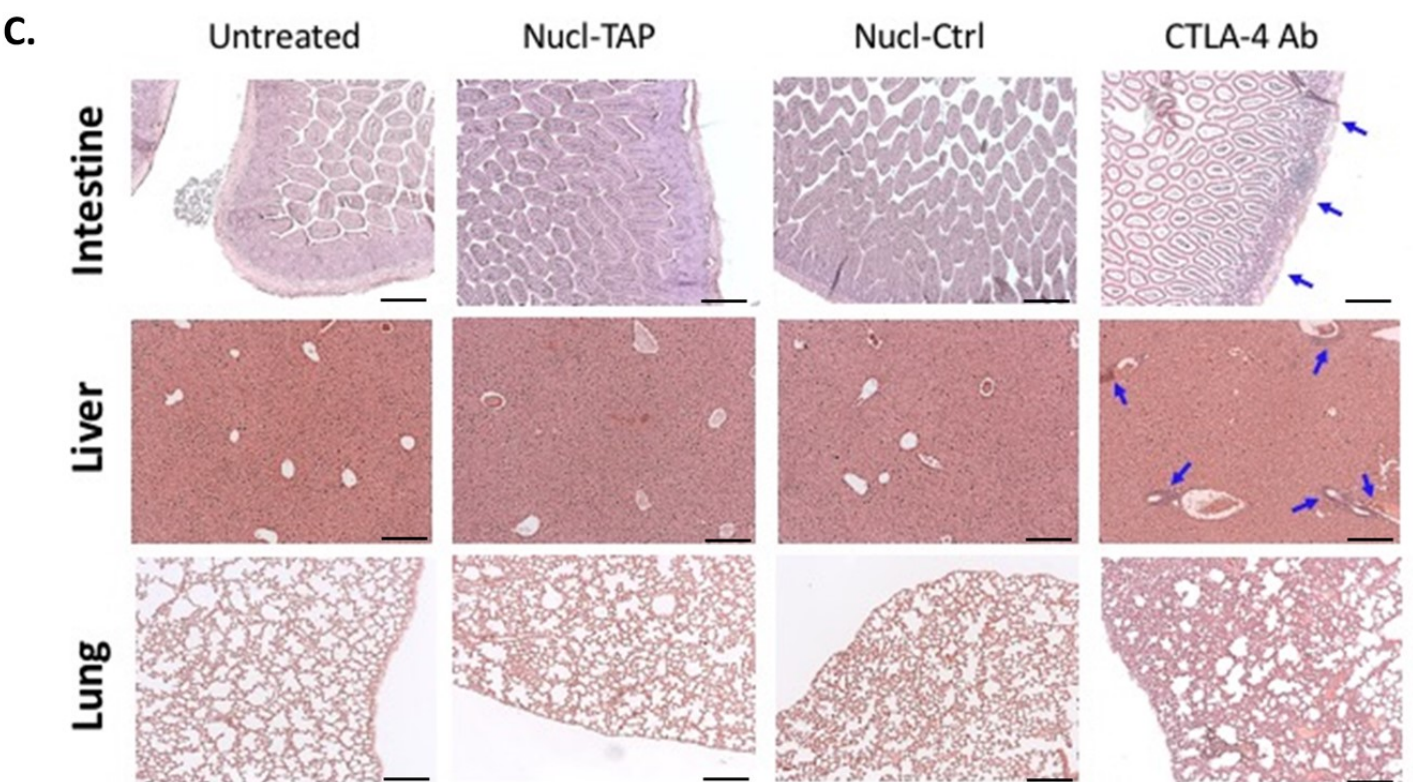

**Supplementary Fig. 5. Toxicity in mice treated with Nucl-TAP.** Balb/c mice (3 mice/group) were administered with Nucl-TAP, Nucl-Ctrl, PD-1 Ab, or Flt3 ligand as indicated using doses and regimen used in the immunotherapy studies. Two days post last administration mice were sacrificed and analyzed (see also Fig. 5F). **A.** Organ weight. Data are represented as means  $\pm$  SEM. **B.** Liver enzymes AST and ALT in the serum. Shaded area represents normal levels of ALT or AST in Balb/c mice (from The Jackson Laboratories (MPD, <http://phenome.jax.org/>). Data represent box plot analysis. No statistical differences were found between groups using the Kruskal-Wallis test with Dunn posttest. **C.** Inflammatory responses in tissue sections stained with hematoxylin and eosin and visualized by light microscopy at 10X magnification (Scale bar: 100  $\mu$ m). One group of mice was also treated with 200  $\mu$ g of CTLA-4 antibody that elicits a comparable antitumor effect<sup>27,28</sup>. Arrows indicate inflammatory foci in mice.



| Variable                                              | Treatment groups (4 mice/group) |                    |                    |
|-------------------------------------------------------|---------------------------------|--------------------|--------------------|
|                                                       | Untreated                       | Nucl-Ctrl          | Nucl-TAP           |
| White Blood Cell Count (WBC) ( $10^3$ cells/ $\mu$ l) | 4.22 $\pm$ 0.26                 | 4.87 $\pm$ 0.50    | 3.65 $\pm$ 0.17    |
| Red Blood Cell Count (RBC) ( $10^3$ cells/ $\mu$ l)   | 9.36 $\pm$ 0.30                 | 9.32 $\pm$ 0.20    | 9.95 $\pm$ 0.61    |
| Hemoglobin (g/DL)                                     | 14.12 $\pm$ 0.33                | 13.72 $\pm$ 0.28   | 14.4 $\pm$ 0.52    |
| Hematocrit (%)                                        | 56.00 $\pm$ 3.16                | 54.00 $\pm$ 1.41   | 55.5 $\pm$ 1.91    |
| Mean Cell Volume (MCV) (fL)                           | 59.75 $\pm$ 2.06                | 57.75 $\pm$ 1.70   | 56.5 $\pm$ 1.00    |
| Mean Cell Hemoglobin (MCH) (pg)                       | 15.00 $\pm$ 0.00                | 14.50 $\pm$ 0.57   | 14.50 $\pm$ 0.57   |
| Mean Cell Hemoglobin Concentration (MCHC) (%)         | 25.50 $\pm$ 1.00                | 25.25 $\pm$ 0.95   | 26.00 $\pm$ 1.41   |
| Segmented Neutrophils ( $10^3$ / $\mu$ l)             | 19.00 $\pm$ 4.54                | 15.50 $\pm$ 1.29   | 17.50 $\pm$ 0.57   |
| Lymphocytes ( $10^3$ / $\mu$ l)                       | 72.75 $\pm$ 2.87                | 75.75 $\pm$ 2.21   | 72.00 $\pm$ 1.70   |
| Monocytes ( $10^3$ / $\mu$ l)                         | 8.25 $\pm$ 2.21                 | 8.5 $\pm$ 1.29     | 10.00 $\pm$ 1.50   |
| RBC Morphology                                        | Mild Polychromasia              | Mild Polychromasia | Mild Polychromasia |
| Platelet Morphology                                   | Normal                          | Normal             | Normal             |
| WBC Morphology                                        | Normal                          | Normal             | Normal             |

**Supplementary Table 1.** Complete blood count analysis in Balb/c mice treated with Nucl-siRNA conjugates.

Untreated mice were used as internal control (normal values for Balb/c mice from The Jackson Laboratory: <http://phenome.jax.org/>). Values are represented as mean  $\pm$  SD. No statistical differences were found comparing Nucl-siRNA conjugates treated mice to controls using the Kruskal–Wallis test with Dunn posttest.
